# Supplementary material
Source: PubMed Central journal article supplement (PMC5895492)
Supplement: NIHMS942855-supplement-Suppl_Information.pdf [file NIHMS942855-supplement-Suppl_Information.pdf]

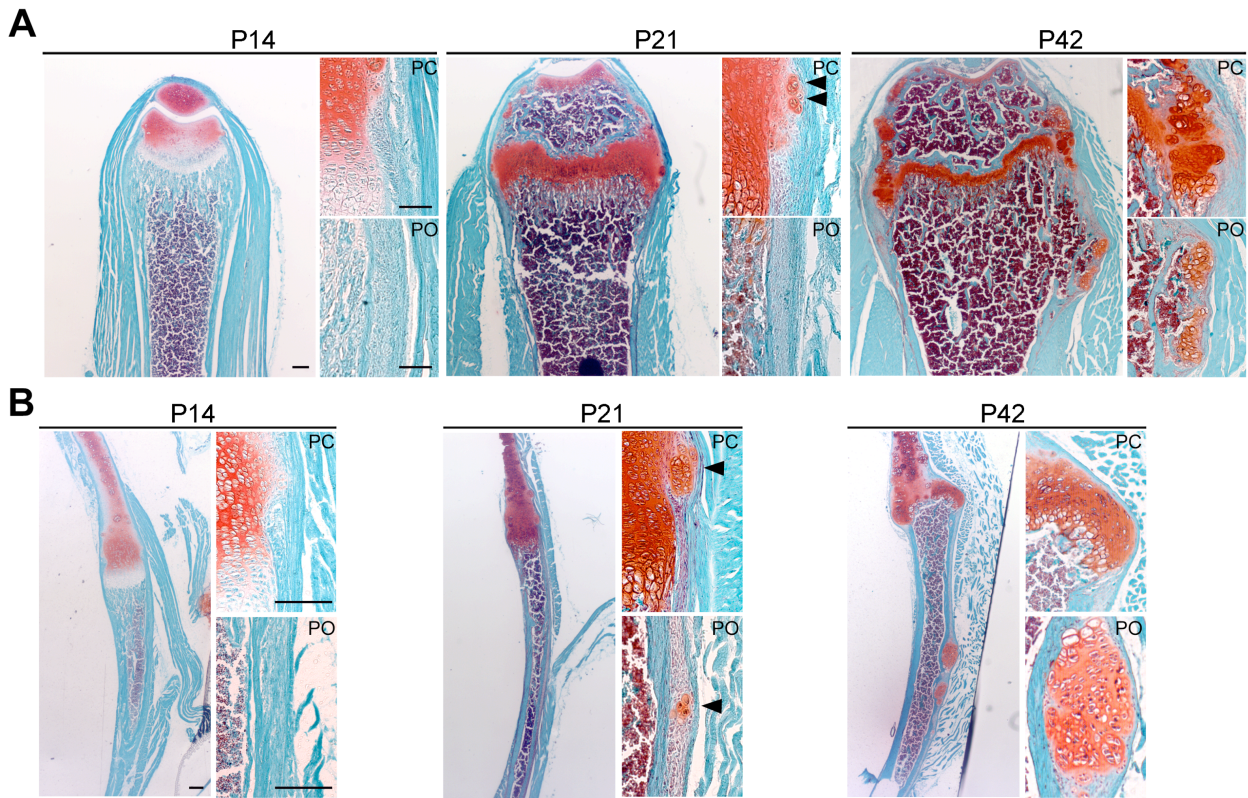

**Supplementary Figure 1. Time course of osteochondroma development in**

*Fsp1<sup>Cre</sup>;Ext1<sup>flox/flox</sup>* mice. Safranin O-stained sections of the distal femur (**A**) and the 10th rib (**B**) of *Fsp1<sup>Cre</sup>;Ext1<sup>flox/flox</sup>* mice at P14, P21 and P42. Small images on the right represent high magnification views of the perichondrium (*PC*) and periosteum (*PO*). Note that no abnormalities are observed at P14. Small abnormal chondrocyte clusters are first detected at P21 (*arrowheads*

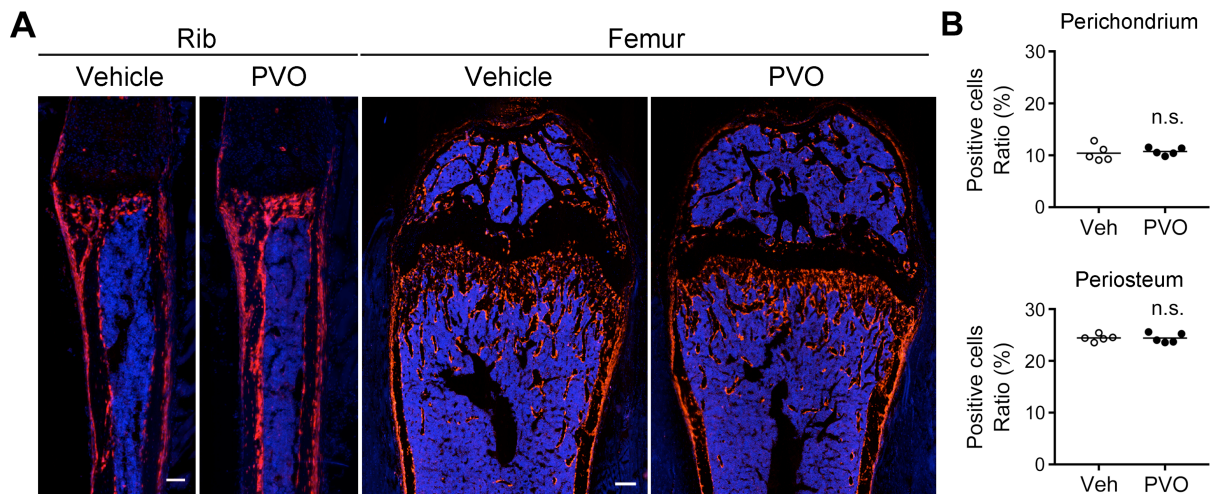

**Supplementary Figure 2. PVO does not alter the efficiency or spatial pattern of recombination driven by *Fsp1<sup>Cre</sup>*.** *Fsp1<sup>Cre</sup>;R26<sup>tdTomato</sup>* mice were treated by daily oral gavage at 1.76 mg/kg of PVO (*PVO*) or vehicle (*Vehicle*) for 21 days starting at P21. (**A**) Sections of the femur and the 10th rib were stained with DAPI (*blue*) and analyzed for the distribution of tdTomato<sup>+</sup> cells (*red*), which are cells that have undergone *Fsp1<sup>Cre</sup>*-mediated recombination and their descendants. Note that PVO treatment did not alter the frequency and distribution of tdTomato<sup>+</sup> cells. Scale bars, 0.1 mm. (**B**) The ratio of the number of recombined (tdTomato<sup>+</sup>) cells relative to the number of DAPI-stained nuclei in the perichondrium and periosteum. *n.s.*, not significant by Student's *t* test. osteochondroma formation. Scale bars, 0.1 mm (**A**); 0.2 mm (**B**).

**Supplementary Table 1. Summary of the results of PVO treatment experiments.**

| Mouse <sup>1</sup> | Treatment period       | Dose [mg/kg/day] | Number of animals (Female/Male) | Body weight at P42 [g] | Number of osteochondromas (% changes relative to vehicle) |                            | Bone length [cm] (% changes relative to vehicle) |                             |                             |                              |                              |
|--------------------|------------------------|------------------|---------------------------------|------------------------|-----------------------------------------------------------|----------------------------|--------------------------------------------------|-----------------------------|-----------------------------|------------------------------|------------------------------|
|                    |                        |                  |                                 |                        | Long bones <sup>2</sup>                                   | Ribs <sup>3</sup>          | Tibia                                            | Femur                       | Ulna                        | Radius                       | Humerus                      |
| CKO                | P14–P42 (Experiment 1) | 0 (vehicle)      | 11 (5/6)                        | 14.3 ± 2.3             | 58.5 ± 8.2                                                | 91.2 ± 13.7                | 1.27 ± 0.04                                      | 1.24 ± 0.05                 | 1.12 ± 0.04                 | 0.90 ± 0.04                  | 1.00 ± 0.04                  |
|                    |                        | 0.27             | 6 (1/5)                         | 14.1 ± 1.6             | 25.3 ± 3.4***<br>(56.8% ↓)                                | 38.8 ± 8.4***<br>(57.5% ↓) | 1.29 ± 0.02<br>(1.6% ↑)                          | 1.27 ± 0.04<br>(2.4% ↑)     | 1.11 ± 0.04<br>(0.9% ↓)     | 0.92 ± 0.03<br>(2.2% ↑)      | 1.01 ± 0.03<br>(1.0% ↑)      |
|                    |                        | 0.88             | 8 (5/3)                         | 13.1 ± 1.4             | 9.0 ± 3.3***<br>(84.6% ↓)                                 | 16.6 ± 3.7***<br>(81.8% ↓) | 1.22 ± 0.04*<br>(3.9% ↓)                         | 0.98 ± 0.04***<br>(21.0% ↓) | 0.98 ± 0.04***<br>(12.5% ↓) | 0.78 ± 0.02***<br>(13.3% ↓)  | 0.82 ± 0.02***<br>(18.0% ↓)  |
|                    |                        | 1.76             | 7 (3/4)                         | 12.5 ± 1.3             | 5.2 ± 1.1***<br>(91.1% ↓)                                 | 8.4 ± 3.1***<br>(90.8% ↓)  | 1.14 ± 0.03***<br>(10.2% ↓)                      | 0.97 ± 0.03***<br>(21.8% ↓) | 0.98 ± 0.02***<br>(12.5% ↓) | 0.79 ± 0.02 ***<br>(12.2% ↓) | 0.82 ± 0.03 ***<br>(18.0% ↓) |
|                    | P21–P42 (Experiment 2) | 0 (vehicle)      | 10 (4/6)                        | 13.9 ± 0.9             | 50.9 ± 5.8                                                | 89.7 ± 9.2                 | 1.24 ± 0.04                                      | 1.24 ± 0.03                 | 1.08 ± 0.02                 | 0.91 ± 0.02                  | 0.99 ± 0.03                  |
|                    |                        | 0.27             | 7 (2/5)                         | 14.4 ± 1.1             | 34.6 ± 3.8***<br>(32.0% ↓)                                | 59.1 ± 7.2***<br>(34.1% ↓) | 1.27 ± 0.04<br>(2.4% ↑)                          | 1.25 ± 0.04<br>(0.8% ↑)     | 1.11 ± 0.02<br>(2.8% ↑)     | 0.92 ± 0.01<br>(1.1% ↑)      | 1.02 ± 0.02*<br>(3.0% ↑)     |
|                    |                        | 0.88             | 7 (2/5)                         | 14.8 ± 1.1             | 16.4 ± 3.9***<br>(67.8% ↓)                                | 40.7 ± 7.2***<br>(54.6% ↓) | 1.28 ± 0.04<br>(3.2% ↑)                          | 1.28 ± 0.03<br>(3.2% ↑)     | 1.11 ± 0.05<br>(2.8% ↑)     | 0.93 ± 0.03*<br>(2.2% ↑)     | 1.03 ± 0.02*<br>(4.0% ↑)     |
|                    |                        | 1.76             | 10 (6/4)                        | 13.7 ± 1.1             | 5.9 ± 2.8***<br>(88.4% ↓)                                 | 20.1 ± 6.2***<br>(77.6% ↓) | 1.28 ± 0.02<br>(3.2% ↑)                          | 1.26 ± 0.02<br>(1.6% ↑)     | 1.10 ± 0.03<br>(1.9% ↑)     | 0.92 ± 0.02<br>(1.1% ↑)      | 1.00 ± 0.02<br>(1.0% ↑)      |
| WT                 | P21–P42                | 0 (vehicle)      | 6 (3/3)                         | 18.6 ± 2.8             | 0                                                         | 0                          | 1.44 ± 0.06                                      | 1.35 ± 0.05                 | 1.20 ± 0.03                 | 0.99 ± 0.03                  | 1.09 ± 0.04                  |
|                    |                        | 1.76             | 6 (3/3)                         | 17.9 ± 2.0             | 0                                                         | 0                          | 1.44 ± 0.03<br>(0.00%)                           | 1.34 ± 0.04<br>(0.7% ↓)     | 1.17 ± 0.05<br>(2.5% ↓)     | 0.96 ± 0.03<br>(3.0% ↓)      | 1.06 ± 0.03<br>(2.8% ↓)      |

<sup>1</sup> CKO, *Fsp1<sup>Cre</sup>;Ext1<sup>flox/flox</sup>*; WT, wild-type C57BL6J.

<sup>2</sup> The total number of osteochondromas in five limb long bones (tibia, femur, ulna, radius, humerus) of the right hemi-skeleton per animal.

<sup>3</sup> The total number of osteochondromas in all ribs except for the first rib of the right hemi-skeleton per animal.

\* p<0.05, \*\*\* p<0.001 relative to the values in corresponding vehicle-treated groups; by one-way ANOVA followed by Bonferroni's post hoc test.
